# Supplementary material for: Effect of Vitamin D Supplements on Relapse or Death in a p53-Immunoreactive Subgroup With Digestive Tract Cancer: Post Hoc Analysis of the AMATERASU Randomized Clinical Trial
Source: PubMed Central journal article supplement (PMC10445201; doi:10.1001/jamanetworkopen.2023.28886), 2023-08-22
Supplement: jamanetwopen-e2328886-s002.pdf [file jamanetwopen-e2328886-s002.pdf]

## Supplemental Online Content

Kanno K, Akutsu T, Ohdaira H, Suzuki Y, Urashima M. Effect of vitamin D supplements on relapse or death in a p53-immunoreactive subgroup with digestive tract cancer: post hoc analysis of the AMATERASU randomized clinical trial. *JAMA Netw Open*. 2023;6(8):e2328886. doi:10.1001/jamanetworkopen.2023.28886

**eTable.** Characteristics of Patients Who Were Anti-p53 Antibody Positive by Intervention

This supplemental material has been provided by the authors to give readers additional information about their work.

**eTable 1. Characteristics of p53-Ab (+) patients stratified by intervention**

|                                         | Intervention      |                 |
|-----------------------------------------|-------------------|-----------------|
|                                         | Vitamin D<br>N=86 | Placebo<br>N=56 |
| 25(OH)D <sup>a</sup> , n (%)            |                   |                 |
| Low: <20 ng/mL                          | 38 (45)           | 18 (32)         |
| Middle: ≥20 and ≤40 ng/mL               | 45 (53)           | 37 (66)         |
| High: >40 ng/mL                         | 2 (2)             | 1 (2)           |
| 25(OH)D <sup>a</sup> serum level, ng/mL |                   |                 |
| Median                                  | 20                | 22              |
| IQR (25%-75%)                           | (16-25)           | (16-27.5)       |
| Sex, n (%)                              |                   |                 |
| Male                                    | 60 (70)           | 36 (64)         |
| Female                                  | 26 (30)           | 20 (36)         |
| Age quartile, n (%)                     |                   |                 |
| Q1, 35-59 years                         | 21 (24)           | 19 (34)         |
| Q2, 60-65 years                         | 14 (16)           | 13 (23)         |
| Q3, 66-73 years                         | 18 (21)           | 16 (29)         |
| Q4, 74-90 years                         | 33 (38)           | 8 (14)          |
| Body mass index quartile, n (%)         |                   |                 |
| Q1, 15.0-19.7 kg/m <sup>2</sup>         | 23 (27)           | 14 (25)         |
| Q2, 19.8-21.8 kg/m <sup>2</sup>         | 22 (26)           | 14 (25)         |
| Q3, 21.9-23.7 kg/m <sup>2</sup>         | 20 (24)           | 16 (29)         |
| Q4, 23.8-37.3 kg/m <sup>2</sup>         | 20 (24)           | 12 (21)         |
| History of other cancers, n (%)         | 3 (3)             | 2 (4)           |
| Comorbidities, n (%)                    |                   |                 |
| Hypertension                            | 28 (33)           | 18 (32)         |
| Diabetes mellitus                       | 19 (22)           | 6 (11)          |
| Endocrine disease                       | 4 (5)             | 2 (4)           |
| Cardiovascular disease                  | 6 (7)             | 0 (0)           |
| Chronic kidney disease                  | 4 (5)             | 1 (2)           |
| Asthma                                  | 1 (1)             | 0 (0)           |
| Orthopedic disease                      | 0 (0)             | 0 (0)           |
| Site of cancer, n (%)                   |                   |                 |
| Esophageal                              | 13 (15)           | 8 (14)          |

|                                |         |         |
|--------------------------------|---------|---------|
| Stomach                        | 27 (31) | 25 (45) |
| Small bowel                    | 0 (0)   | 0 (0)   |
| Colorectal                     | 46 (53) | 23 (41) |
| Stage, n (%)                   |         |         |
| I                              | 30 (35) | 21 (38) |
| II                             | 28 (33) | 16 (29) |
| III                            | 28 (33) | 19 (34) |
| Pathology                      |         |         |
| Adenocarcinoma, n (%)          | 72 (84) | 48 (86) |
| Squamous cell carcinoma, n (%) | 13 (15) | 8 (14)  |
| Other, n (%)                   | 1 (1)   | 0 (0)   |
| Adjuvant chemotherapy, n (%)   | 35 (41) | 24 (43) |

<sup>a</sup> 25-hydroxy vitamin D
