# Supplementary material for: Effect of Vitamin D Supplements on Relapse or Death in a p53-Immunoreactive Subgroup With Digestive Tract Cancer: Post Hoc Analysis of the AMATERASU Randomized Clinical Trial
Source: PubMed Central journal article supplement (PMC10445201; doi:10.1001/jamanetworkopen.2023.28886), 2023-08-22
Supplement: jamanetwopen-e2328886-s003.pdf [file jamanetwopen-e2328886-s003.pdf]

## Data Sharing Statement

Kanno. Effect of Vitamin D Supplements on Relapse or Death in a p53-Immunoreactive Subgroup With Digestive Tract Cancer: Post Hoc Analysis of the AMATERASU Randomized Clinical Trial. *JAMA Netw Open*. Published online August 15, 2023. doi:10.1001/jamanetworkopen.2023.28886

### Data

**Data available:** Yes

**Data types:** Deidentified participant data

**How to access data:** The principal investigator ([urashima@jikei.ac.jp](mailto:urashima@jikei.ac.jp)) had full access to all the data in the study and takes responsibility for the integrity of the data and the accuracy of the data analysis.

**When available:** With publication

### Supporting Documents

**Document types:** None

### Additional Information

**Who can access the data:** The principal investigator ([urashima@jikei.ac.jp](mailto:urashima@jikei.ac.jp)) had full access to all the data in the study and takes responsibility for the integrity of the data and the accuracy of the data analysis.

**Types of analyses:** for review and meta-analysis

**Mechanisms of data availability:** after approval of a proposal
